# Supplementary material for: Rapid change of fecal microbiome and disappearance of Clostridium difficile in a colonized infant after transition from breast milk to cow milk
Source: PubMed Central journal article supplement (PMC5055705; doi:10.1186/s40168-016-0198-6), 2016-10-07

R-squared = 0.39  
p-value: 6.8e-07

Shannon Diversity

3.0  
2.5  
2.0  
1.5

0

100

200

300

Days

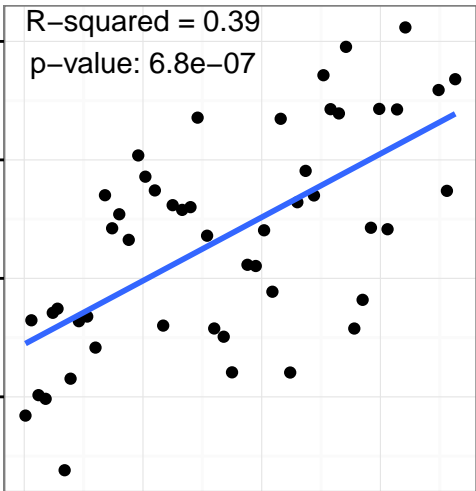

Supplement: 40168_2016_198_MOESM2_ESM.pdf [file 40168_2016_198_MOESM2_ESM.pdf]
